# Supplementary material
Source: PubMed Central journal article supplement (PMC7677105)
Supplement: 253_2020_11018_MOESM1_ESM.pdf [file 253_2020_11018_MOESM1_ESM.pdf]

**Journal name: Applied Microbiology and Biotechnology**

**Recombinant *Treponema pallidum* protein Tp0768 promotes  
proinflammatory cytokines secretion of macrophages through ER  
stress and ROS/NF- $\kappa$ B pathway**

Wei Li<sup>1†</sup>, Xiangping Zhou<sup>1†</sup>, Jialun Cai<sup>1</sup>, Feijun Zhao<sup>2</sup>, Ting Cao<sup>1</sup>, Lichang Ning<sup>1</sup>, Chunyi Luo<sup>1</sup>, Xinhua Xiao<sup>3\*</sup> and Shuangquan Liu<sup>1\*</sup>

1 Department of Clinical Laboratory, The First Affiliated Hospital of University of South China, Hengyang, Hunan, China

2 Institute of Pathogenic Biology and Key Laboratory of Special Pathogen Prevention and Control of Hunan Province, University of South China, Hengyang, Hunan, China.

3 Department of Endocrinolog, The First Affiliated Hospital of University of South China, Hengyang, Hunan, China

\*Correspondence: [dantelliu@163.com](mailto:dantelliu@163.com); [xinhua0102@163.com](mailto:xinhua0102@163.com)

\*Corresponding authors:

Xinhua Xiao<sup>3\*</sup>

No. 69, Chuanshan Road, Hengyang City, Hunan, 421000, China

Email address: [xinhua0102@163.com](mailto:xinhua0102@163.com)

Shuangquan Liu<sup>1\*</sup>

No. 69, Chuanshan Road, Hengyang City, Hunan, 421000, China

Email address: [dantelliu@163.com](mailto:dantelliu@163.com)

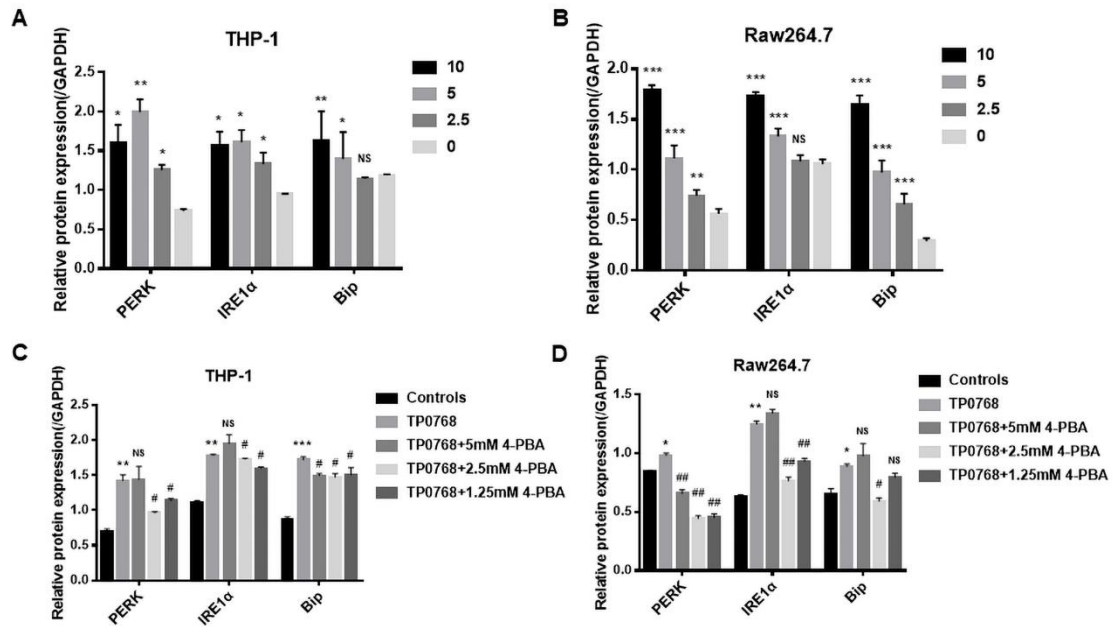

**Figure S1. Gray scale scanning in Figure 2B and 2C.** (A) (B) The ER stress-related proteins PERK, IRE1 $\alpha$ , and Bip in Figure 2B were scanned by ImageJ software. (C) (D) Quantify the protein levels of PERK, IRE1 $\alpha$ , and Bip in Figure 2C using ImageJ software. NS, not significant. \* $p < 0.05$ , \*\* $p < 0.01$  and \*\*\* $p < 0.001$  indicate a significant difference from the control group. # $p < 0.05$ , ## $p < 0.01$  and ### $p < 0.001$  indicate a significant difference from the TP0768 group.
